# Supplementary material
Source: Springer Nature journal article supplement (https://www.springermedizin.de/resource/supplementary/12889_2009_1580_MOESM2_ESM.pdf/9503480)
Supplement: MOESM2 [file 9503480]

**Enrollment**

Assessed for eligibility  
(37 Municipal Health Services (MHSs)  
in  
the Netherlands)

Excluded  
- Not meeting inclusion criteria (3 MHSs)  
- Other reasons, like merger MHSs (25 MHSs)

Included  
(9 MHSs)

Assessed for eligibility  
(115 Youth Health Care teams (YHC  
teams) from 9 MHSs)

Excluded  
- Not meeting inclusion criteria (58 YHC teams)  
- Other reasons, like decision of the MHSs how  
many teams could participate (13 YHC teams)

Included and randomly  
allocated within MHS  
(44 YHC teams)

**Allocation**

Allocated to intervention group (22 YHC teams)

Allocated to control group (22 YHC teams)

Included overweight children and their parents (n = ...)  
- Children and their parents received intervention (n = ...)  
- Did not receive intervention (no basic Dutch language  
skills, other problems within family, etc.) (n = ...)

Included overweight children and their parents (n = ...)  
- Children and their parents received usual care (n = ...)

**Follow-up**

Lost to follow-up: ... (..) parents did not respond to  
baseline questionnaire

Lost to follow-up: ... (..) parents did not respond to  
baseline questionnaire

Lost to follow-up: ... (..) parents did not respond to  
first follow-up (questionnaire)

Lost to follow-up: ... (..) parents did not respond to  
first follow-up (questionnaire)

Lost to follow-up: ... (..) parents did not respond to  
second follow-up (questionnaire & body measurements)

Lost to follow-up: ... (..) parents did not respond to  
second follow-up (questionnaire & body measurements)

**Analysis**

- Clusters: analyzed ... YHC teams,  
median team size = ... , range ... - ...  
- Participants: .... (..) overweight children and their  
parents

- Clusters: analyzed ... YHC teams,  
median team size = ... , range ... - ...  
- Participants: .... (..) overweight children and their  
parents
